# Supplementary material for: Lung function parameters improve prediction of VO2peak in an elderly population: The Generation 100 study
Source: PubMed Central journal article supplement (PMC5358855; doi:10.1371/journal.pone.0174058), 2017-03-20

## S1 File. Boxplots and histograms with normal curves for dependent and added independent variables

Dashed line in box-plots represent mean and bold line represent median.

# VO<sub>2</sub>peak

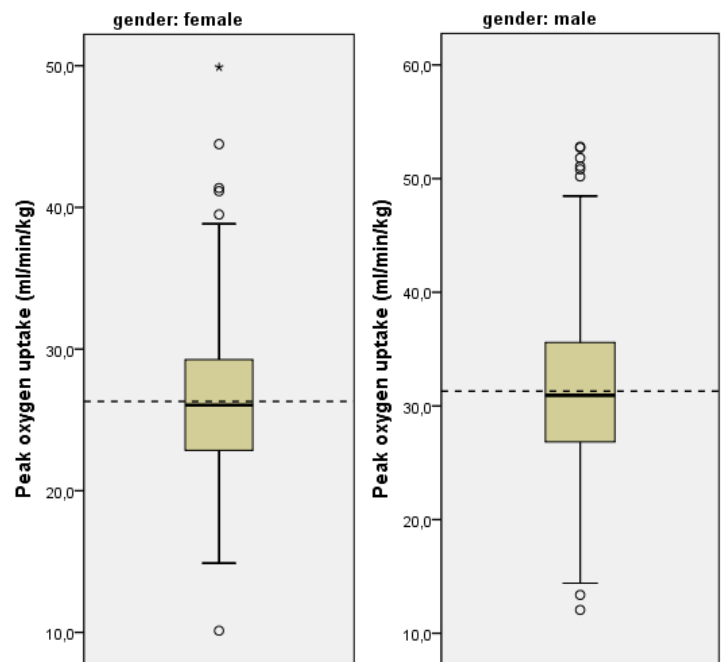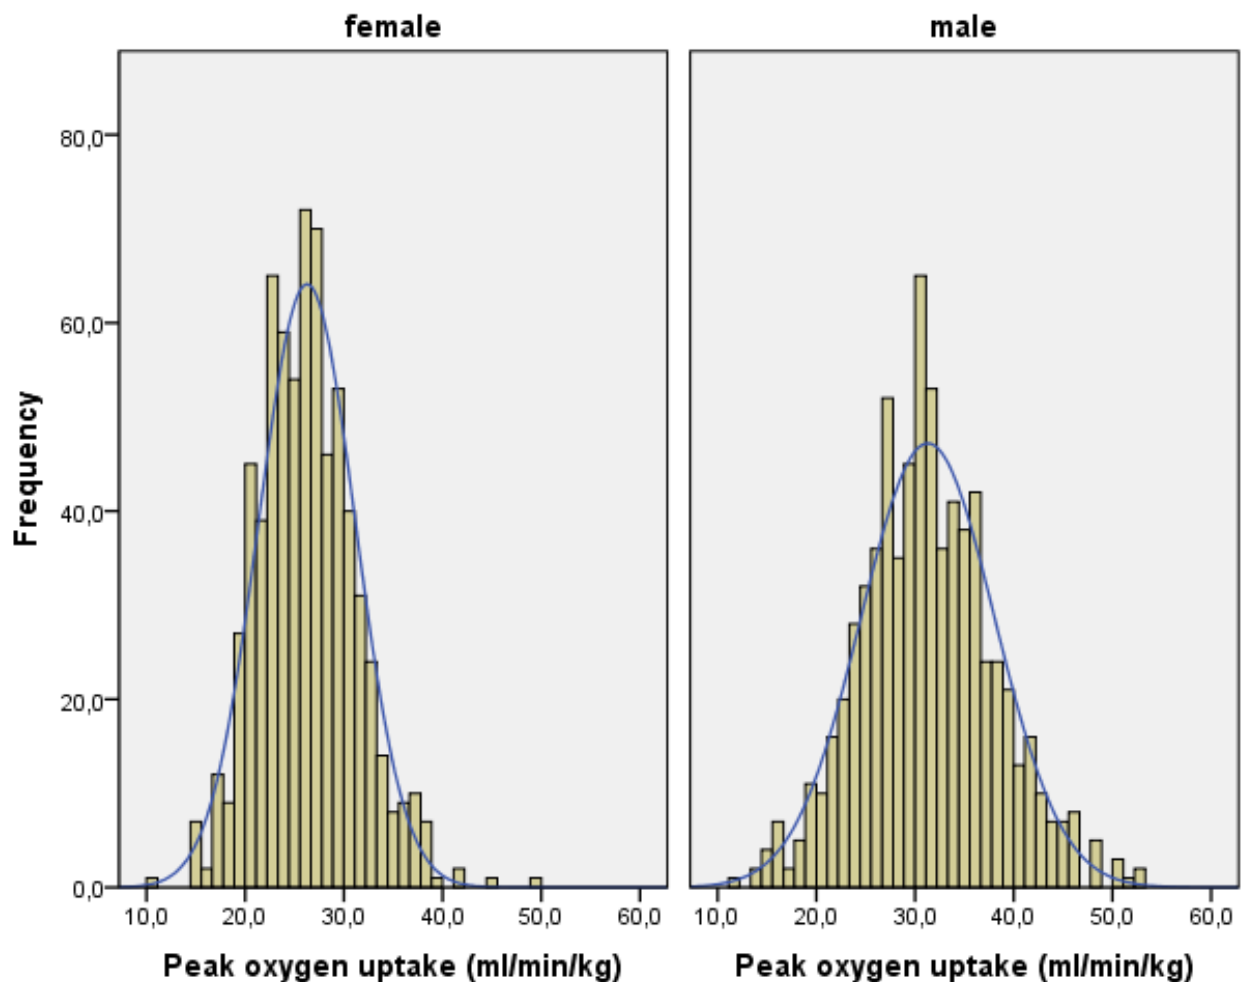

# FEV<sub>1</sub>

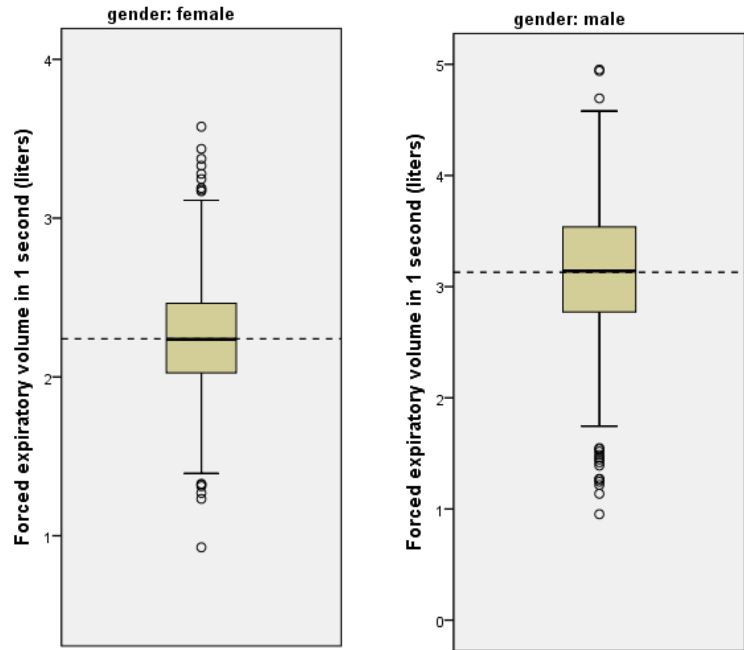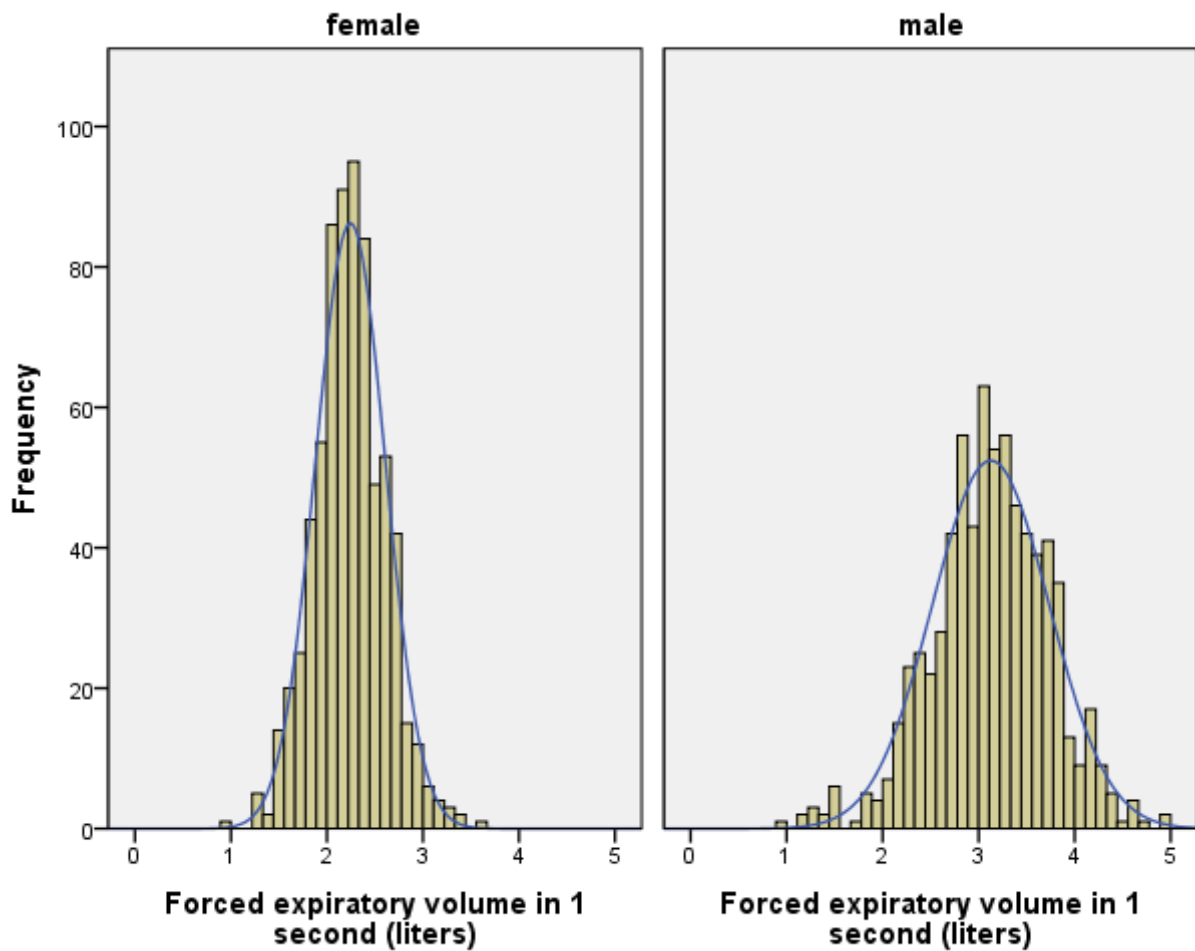

# Hemoglobin

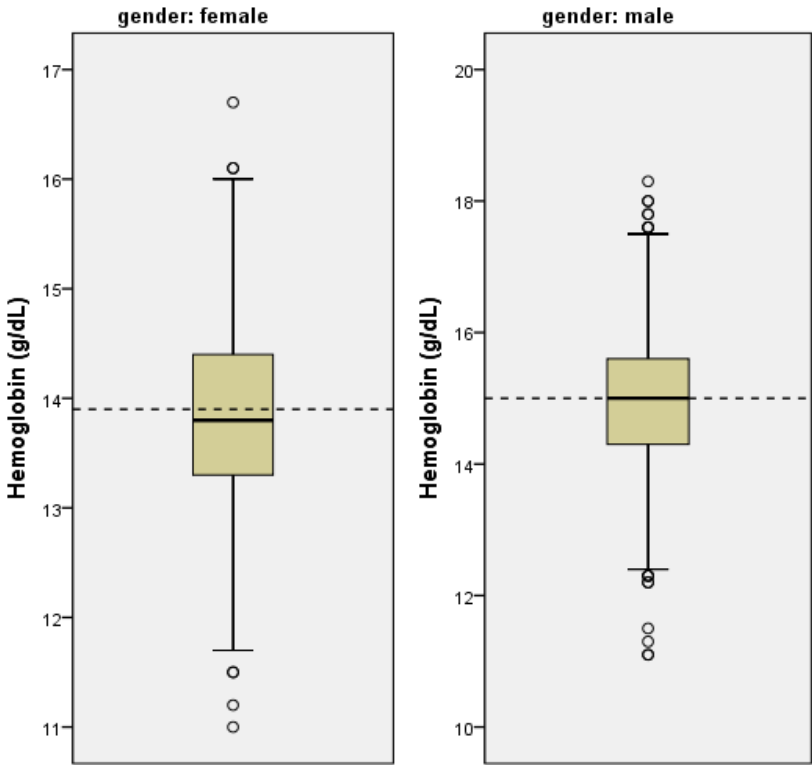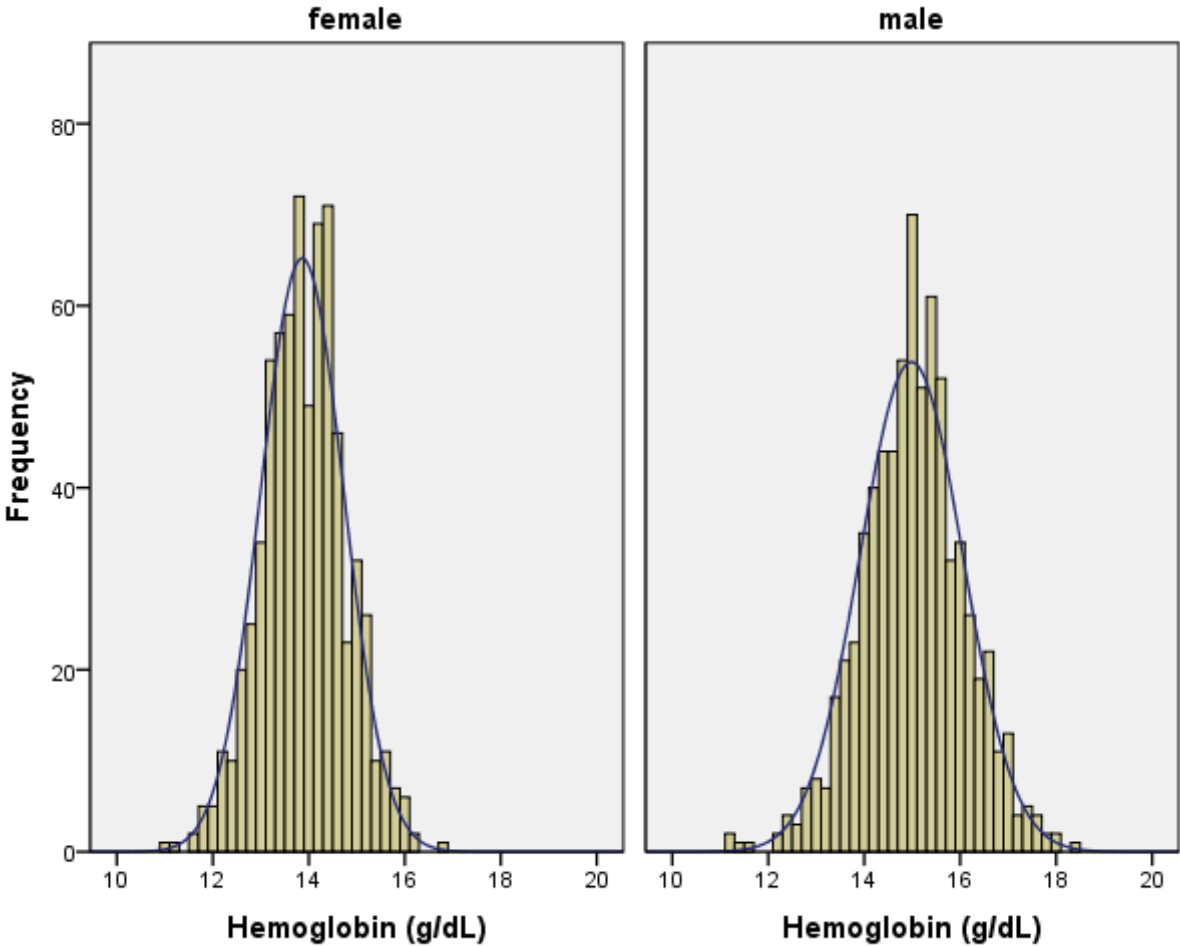

$D_{LCO}/VA$

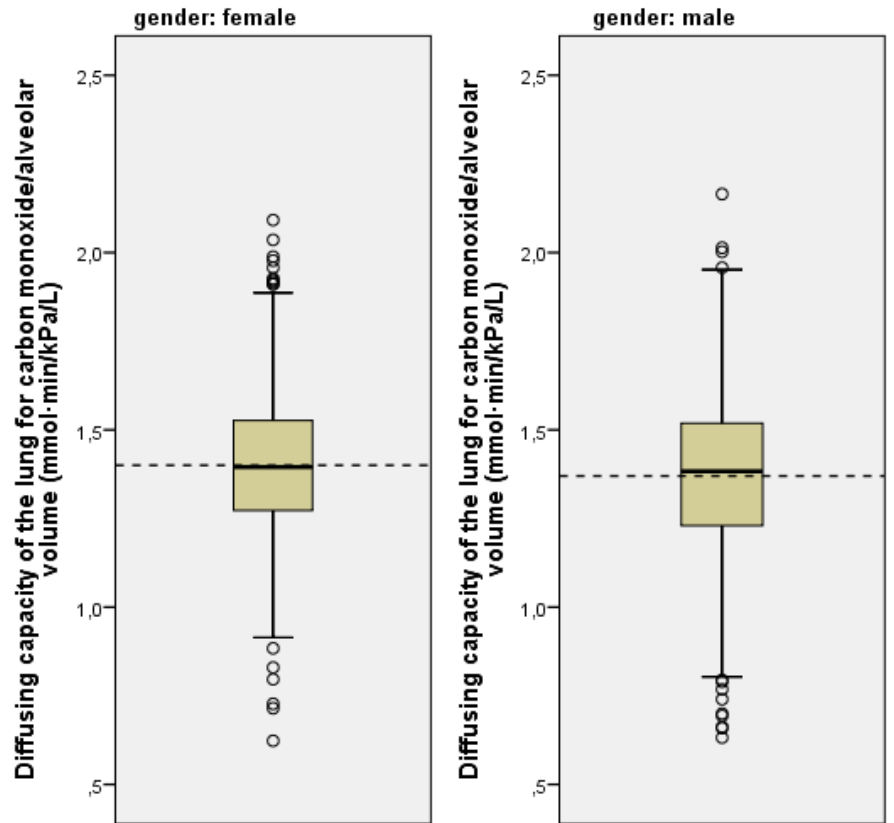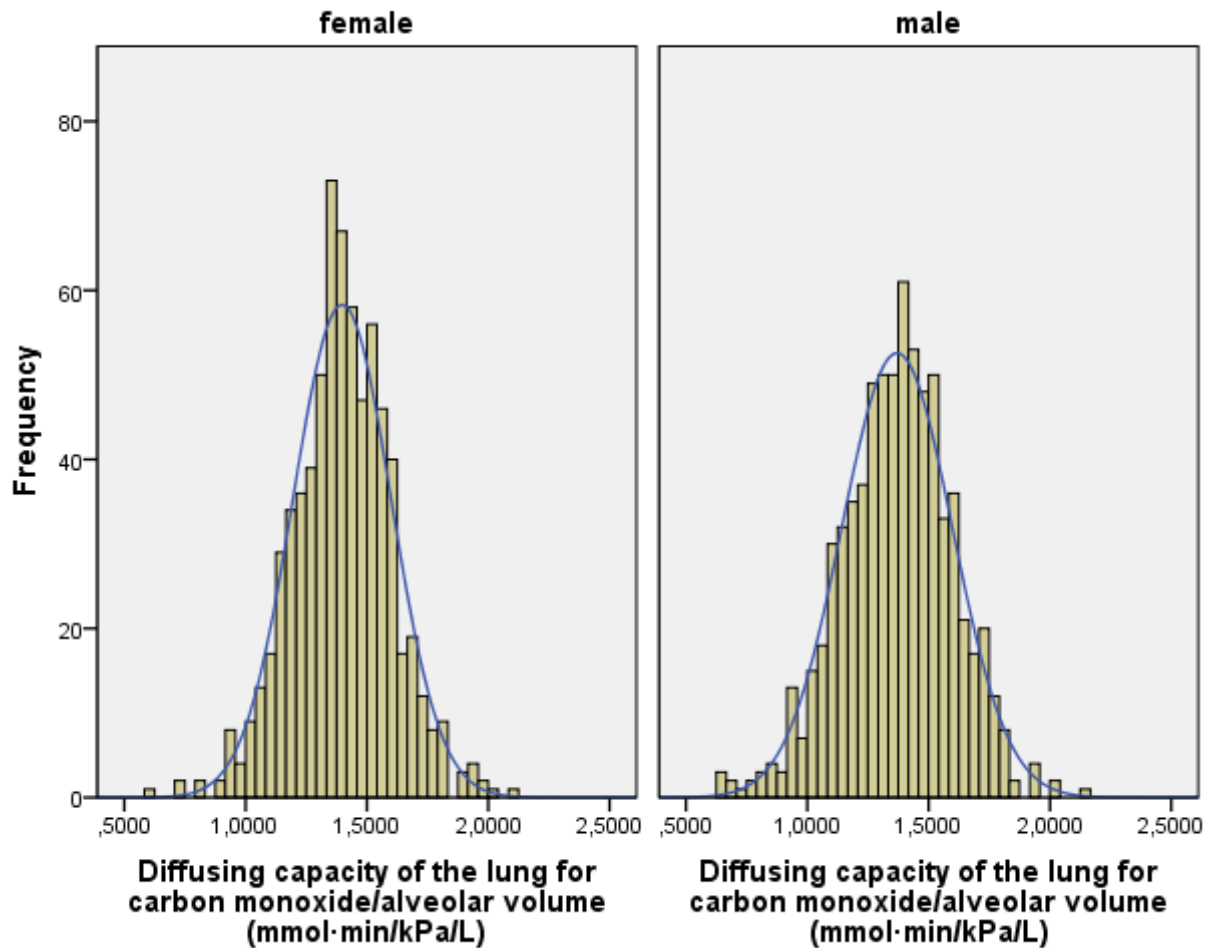

Supplement: pone.0174058.s001.pdf [file pone.0174058.s001.pdf]
