# Supplementary material for: Lung function parameters improve prediction of VO2peak in an elderly population: The Generation 100 study
Source: PubMed Central journal article supplement (PMC5358855; doi:10.1371/journal.pone.0174058), 2017-03-20
Supplement: pone.0174058.s002.pdf [file pone.0174058.s002.pdf]

## S2 File. Description of regression models with FEV1, Hb and DLCO/VA added separately

Table A showing summary statistics of multiple linear regressions models predicting  $VO_{2peak}$ . Table B showing regression coefficients of models. Abbreviations: WC – waist circumference, RHR – resting heart rate, Act – Self-reported leisure time activity, FEV1 – Forced expiratory volume in 1 second, Hb – blood hemoglobin concentration, DLCO/VA – diffusing capacity of the lungs for carbon monoxide/estimated alveolar volume.

**TABLE A**

| Independent variables                | R    | Adjusted R <sup>2</sup> | Std. Error of the Estimate |
|--------------------------------------|------|-------------------------|----------------------------|
| <u>Men:</u>                          |      |                         |                            |
| Age, Act, WC, RHR                    | .564 | .318                    | 5.6143                     |
| Age, Act, WC, RHR, FEV1              | .626 | .392                    | 5.3059                     |
| Age, Act, WC, RHR, Hb                | .589 | .346                    | 5.5003                     |
| Age, Act, WC, RHR, DLCO/VA           | .625 | .391                    | 5.3102                     |
| Age, WC, RHR, Act, Hb, FEV1, DLCO/VA | .699 | .484                    | 4.8704                     |
| <u>Women:</u>                        |      |                         |                            |
| Age, WC, RHR, Act                    | .569 | .320                    | 4.0415                     |
| Age, WC, RHR, Act, FEV1              | .588 | .341                    | 3.9782                     |
| Age, WC, RHR, Act, Hb                | .573 | .323                    | 4.0324                     |
| Age, WC, RHR, Act, DLCO/VA           | .592 | .345                    | 3.9653                     |
| Age, WC, RHR, Act, Hb, FEV1, DLCO/VA | .619 | .378                    | 3.8669                     |

**TABLE B**

| Model components | B-coefficients | B-coefficients |
|------------------|----------------|----------------|
|                  | men            | women          |
| Intercept        | 77.698         | 61.281         |
| Resting_HR       | -.048          | -.066          |
| WC (cm)          | -.297          | -.194          |
| activityscore    | .155           | .122           |
| Age              | -.348          | -.257          |
| FEV1             | 3.077          | 2.023          |
| Intercept        | 82.819         | 65.340         |
| Resting_HR       | -.059          | -.072          |
| WC (cm)          | -.347          | -.206          |
| activityscore    | .166           | .121           |
| Age              | -.436          | -.300          |
| hemoglobin       | 1.097          | .367           |
| Intercept        | 79.244         | 61.547         |
| Resting_HR       | -.052          | -.068          |
| WC(cm)           | -.353          | -.213          |
| activityscore    | .153           | .117           |
| age              | -.313          | -.249          |
| DLCO/VA          | 8.253          | 4.029          |
